# Supplementary material for: COVID-19 in European Soccer: A Public 2-Year Comparison of COVID-19 Case Management and Case Characteristics between the 1st Bundesliga, La Liga, Serie A and the Premier League
Source: MDPI journal article supplement (doi:10.3390/life12081220), 2022-08-11
Supplement: s1 [file s1]

*Adnex S1: Odds ratio surrounding incidence with probability of occurrence of COVID-19 cases in the leagues.*

| Bundesliga |           |                               |                                  |       |
|------------|-----------|-------------------------------|----------------------------------|-------|
| Category   | Incidence | Weeks with reported infection | Weeks without reported infection | Total |
| 0          | <50       | 4                             | 19                               | 23    |
| 1          | 50-199    | 14                            | 10                               | 24    |
| 2          | 200-499   | 16                            | 9                                | 25    |
| 3          | >500      | 10                            | 1                                | 11    |
|            |           | 44                            | 39                               |       |

| Premier League |           |                               |                                  |       |
|----------------|-----------|-------------------------------|----------------------------------|-------|
| Category       | Incidence | Weeks with reported infection | Weeks without reported infection | Total |
| 0              | <50       | 1                             | 14                               | 15    |
| 1              | 50-199    | 5                             | 11                               | 16    |
| 2              | 200-499   | 10                            | 5                                | 15    |
| 3              | >500      | 18                            | 19                               | 37    |
|                |           | 34                            | 49                               |       |

| Serie A  |           |                               |                                  |       |
|----------|-----------|-------------------------------|----------------------------------|-------|
| Category | Incidence | Weeks with reported infection | Weeks without reported infection | Total |
| 0        | <50       | 6                             | 13                               | 19    |
| 1        | 50-199    | 10                            | 14                               | 24    |
| 2        | 200-499   | 22                            | 5                                | 27    |
| 3        | >500      | 13                            | 0                                | 13    |
|          |           | 51                            | 32                               |       |

| La Liga  |           |                               |                                  |       |
|----------|-----------|-------------------------------|----------------------------------|-------|
| Category | Incidence | Weeks with reported infection | Weeks without reported infection | Total |
| 0        | <50       | 1                             | 5                                | 6     |
| 1        | 50-199    | 5                             | 22                               | 27    |
| 2        | 200-499   | 15                            | 13                               | 31    |
| 3        | >500      | 13                            | 6                                | 19    |
|          |           | 34                            | 46                               |       |

Environmental national incidence for new Covid-19 cases was categorized for every week of the studied period related to ECDC data. For every week new reported cases in the related league were counted.
